# Supplementary material
Source: publisher figshare collection journal article supplement (https://frontiersin.figshare.com/ndownloader/files/25723868)
Supplement: Supplementary file [file 25723868]

## SUPPLEMENTARY FIGURES

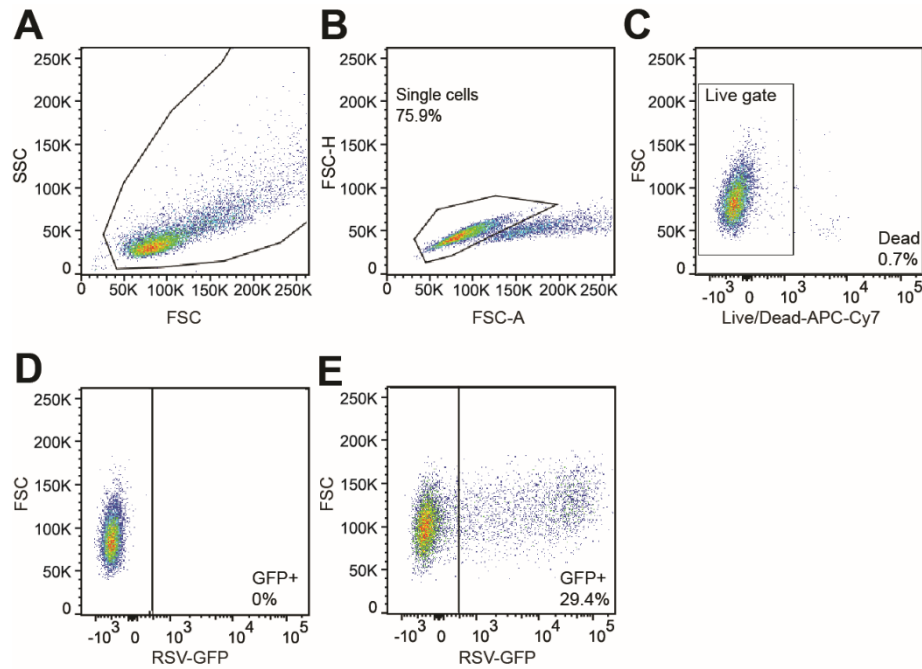

### Supplementary Figure 1. Flow cytometry gating strategy for A549 cells

(A) A549 cells were distinguished from debris using forward-scattered light (FSC) and side-scattered light (SSC). (B) Single cells were then selected using FSC-Area versus FSC-Height and subsequently, (C) dead cells were excluded using Live/Dead fixable near-IR dead cell stain kit (APC-Cy7). (D) The proportion of infected cells was determined using a GFP gate. (E) Example of the GFP gate in an RSV infected sample.

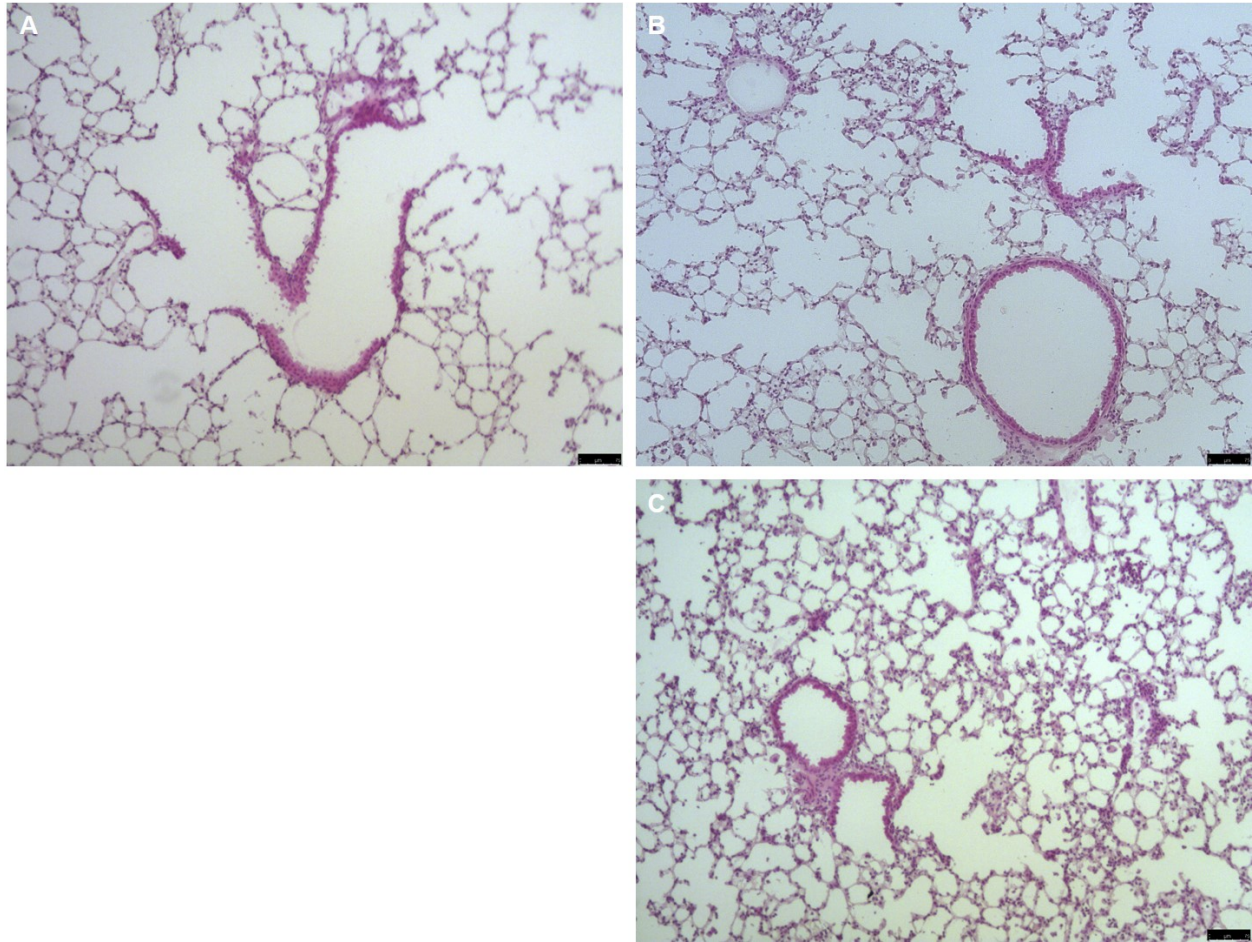

**Supplementary Figure 2. RSV infection alone or RSV infection in combination with ssON treatment did not affect the overall pathology in murine lungs**

Hematoxylin and eosin staining of lungs from mice treated with (A) PBS, (B) RSV or (C) RSV and ssON (6.25 $\mu$ g), 4 days post infection. Representative pictures for each treatment group are shown at a 10X magnification. Scale bars = 75 $\mu$ m.

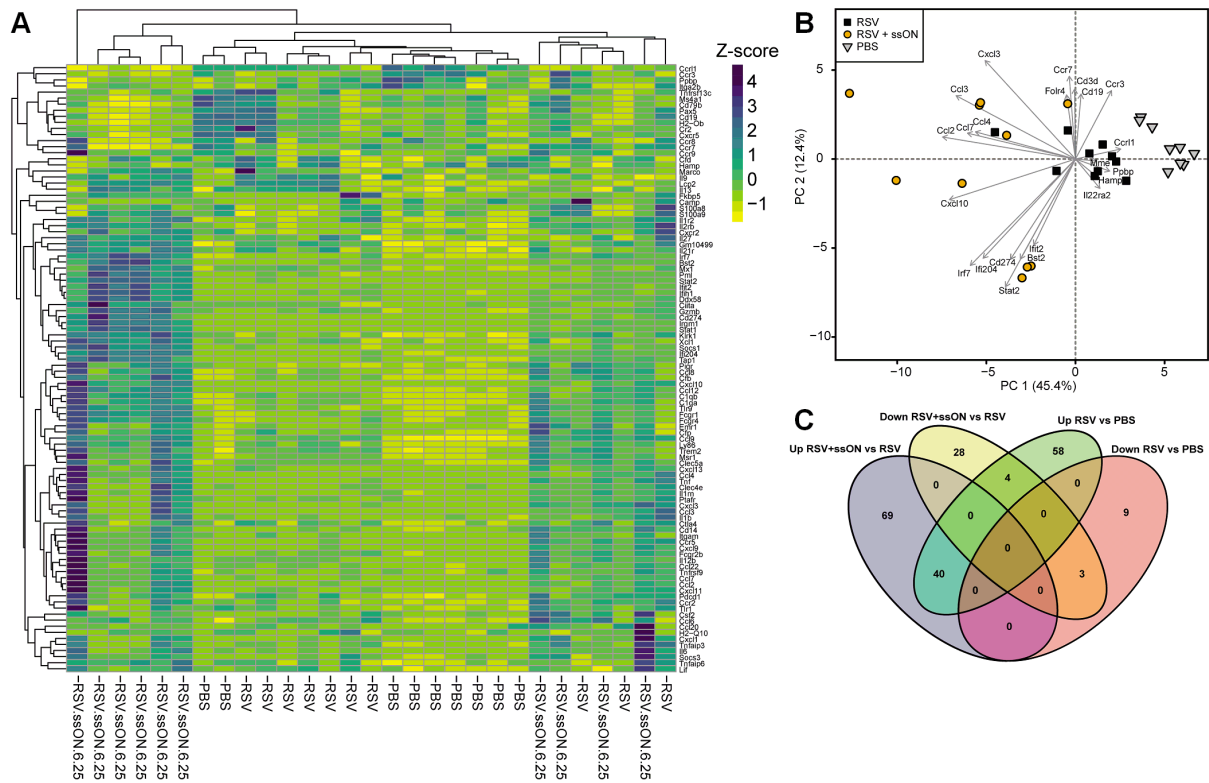

### Supplementary Figure 3. RSV infection alone and RSV infection in combination with ssON treatment results in a differential immune profile in the lungs of mice

RNA was extracted from the right lung lobes of mice treated with PBS, infected with RSV or from RSV infected mice treated with ssON (6.25 $\mu$ g) 4 days post infection and analyzed using Nanostring technology. Data consist of 9-10 mice per treatment from two independent experiments. **(A)** DESeq2 analysis was used to normalize the immune gene expression to the internal reference genes and the top 100 most variable genes after rlog transformation were selected for heatmap visualization of z-scores using the *scale* function in base R. **(B)** Principle component analysis (PCA) plot of sample after immune gene expression-based RNA profiling. DESeq2 analysis was used to normalize the immune gene expression to the internal reference genes and a PCA was conducted after regularized log transformation of the data. The top 10 genes based on variable loadings for the first two principal components are displayed in the graph. **(C)** Venn diagram after differential gene expression comparisons of immune gene expression profiles. DESeq2 was used to normalize the immune gene expression to the internal reference genes and to conduct differential gene expression analysis for two independent comparisons: (i) RSV vs PBS and (ii) RSV + ssON vs RSV. For each comparison, genes with adjusted p-value < 0.05 were extracted and used for creation of the Venn diagram.

**A**

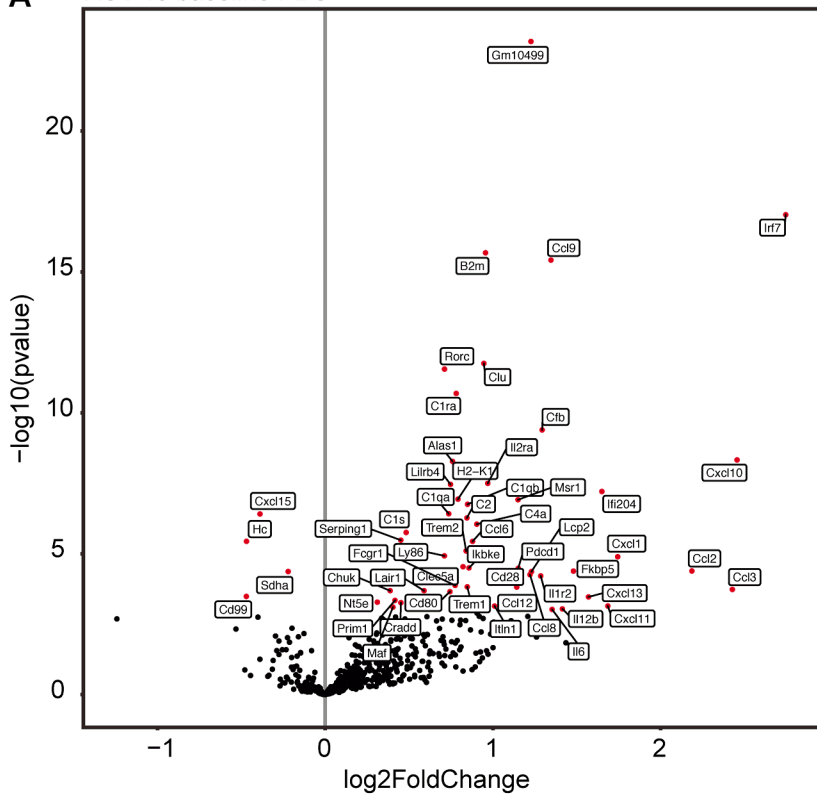

**B**

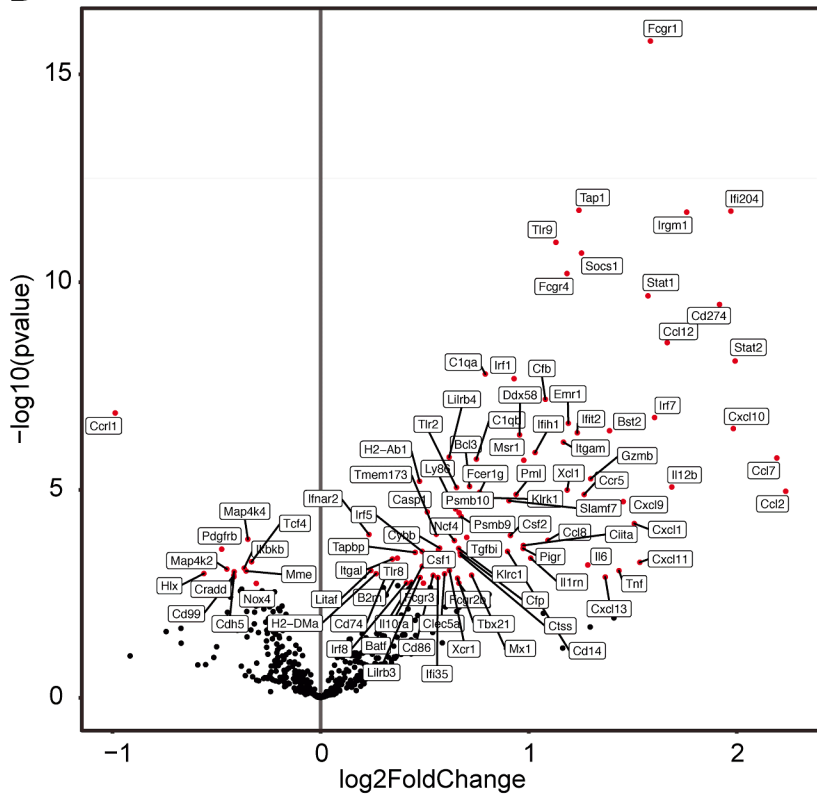

**Supplementary Figure 4. ssON treatment *in vivo* induces a differential immune profile in the lungs of RSV infected mice**

RNA was extracted from the right lung lobes of mice treated with PBS, infected with RSV or from RSV infected mice treated with ssON (6.5µg) 4 days post infection and analyzed using Nanostring technology. Data consist of 9-10 mice per treatment from two independent experiments. DESeq2 analysis was used to normalize the immune gene expression to the internal reference genes. Genes with an adjusted p-value below 0.01 are marked with red color. Volcano plots showing the expression profile of immune genes in (A) RSV infected mice compared to PBS treated mice and (B) ssON treated RSV infected mice compared to RSV infected mice.

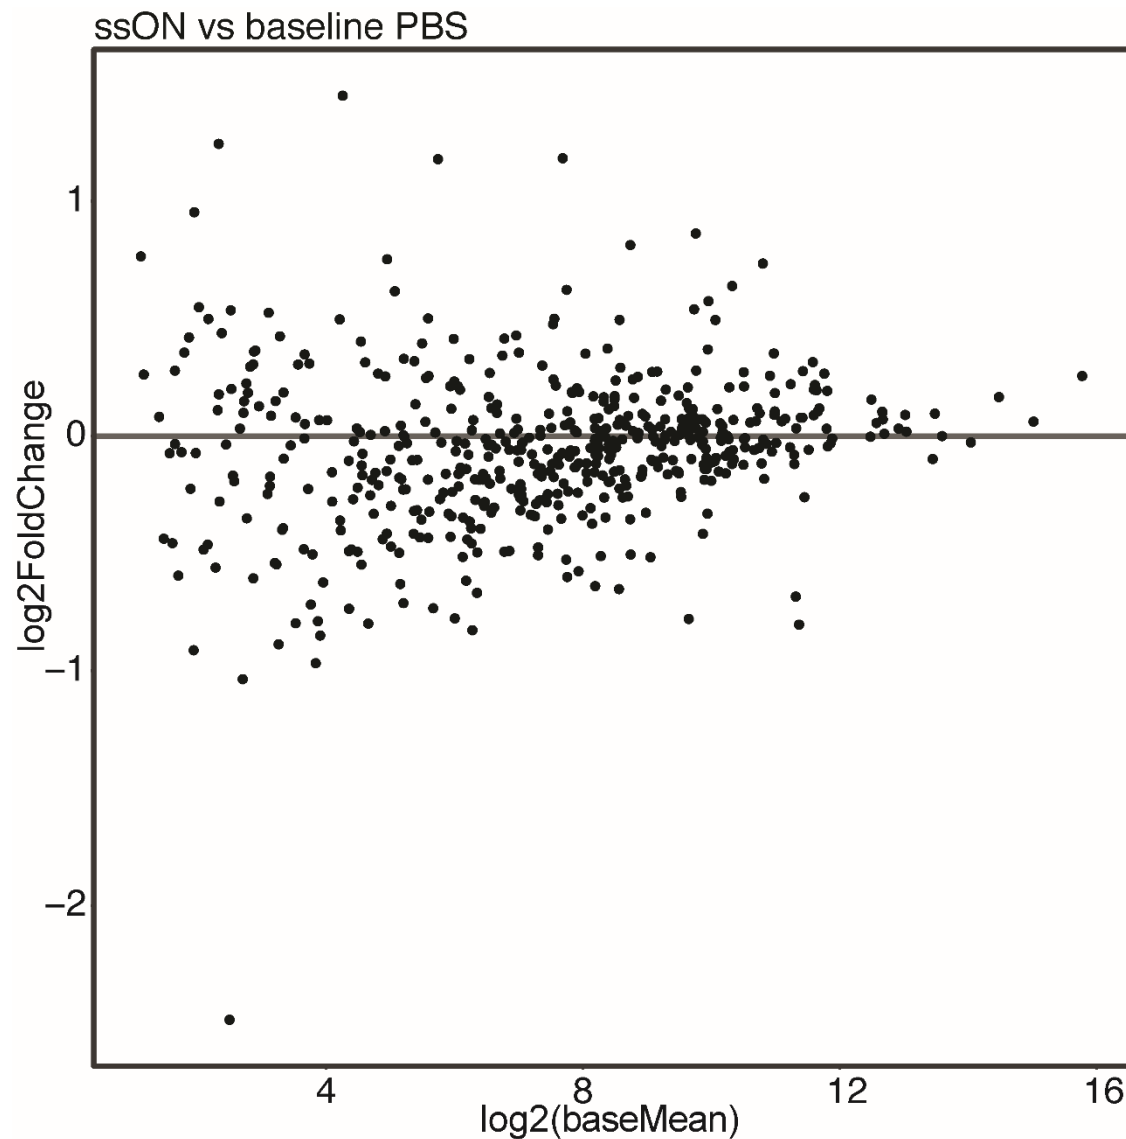

**Supplementary Figure 5. ssON treatment in the absence of RSV infection does not induce any significant upregulation or downregulation of ISGs**

RNA was extracted from the right lobes of mice treated with PBS or ssON (6.25 $\mu$ g) 4 days post treatment and analyzed using Nanostring technology. Data consist of 5-10 mice per treatment from two independent experiments. DEseq2 analysis was used to normalize the immune gene expression to the internal references genes. MA-plots showing the expression profile in log2 fold change of immune genes in ssON treated mice compared to PBS treated mice.

**Supplementary Table 1. List of ISG genes**

Table show log2foldchange of the ISGs included in nanostring analysis. Significantly upregulated genes marked in bold for each treatment.

| <b>Gene</b>    | <b>RSV* infection compared to PBS^ treatment</b> | <b>ssON treatment of RSV infection" compared to RSV* infection</b> |
|----------------|--------------------------------------------------|--------------------------------------------------------------------|
| <i>B2m</i>     | <b>0.96</b>                                      | <b>0.37</b>                                                        |
| <i>Bcl3</i>    | 0.31                                             | <b>0.71</b>                                                        |
| <i>Bst2</i>    | <b>0.90</b>                                      | <b>1.39</b>                                                        |
| <i>C1s</i>     | <b>0.48</b>                                      | 0.03                                                               |
| <i>Casp1</i>   | 0.23                                             | <b>0.51</b>                                                        |
| <i>Ccl19</i>   | <b>0.84</b>                                      | -0.26                                                              |
| <i>Ccl2</i>    | <b>2.19</b>                                      | <b>2.23</b>                                                        |
| <i>Ccl4</i>    | <b>1.78</b>                                      | 1.29                                                               |
| <i>Ccl5</i>    | 0.22                                             | 0.31                                                               |
| <i>Ccl8</i>    | <b>1.22</b>                                      | <b>1.09</b>                                                        |
| <i>Cd163</i>   | 0.32                                             | -0.18                                                              |
| <i>Cd247</i>   | 0.05                                             | <b>0.02</b>                                                        |
| <i>Cd69</i>    | 0.03                                             | 0.33                                                               |
| <i>Cd74</i>    | -0.08                                            | <b>0.33</b>                                                        |
| <i>Cd80</i>    | <b>0.74</b>                                      | <b>0.46</b>                                                        |
| <i>Cd9</i>     | 0.04                                             | -0.01                                                              |
| <i>Cdkn1a</i>  | 0.22                                             | 0.04                                                               |
| <i>Ceacam1</i> | 0.10                                             | 0.01                                                               |
| <i>Cfb</i>     | <b>1.29</b>                                      | <b>1.07</b>                                                        |
| <i>Cx3cl1</i>  | -0.29                                            | -0.39                                                              |
| <i>Cxcl10</i>  | <b>2.46</b>                                      | <b>1.98</b>                                                        |
| <i>Cxcl11</i>  | <b>1.69</b>                                      | <b>1.53</b>                                                        |
| <i>Cxcl9</i>   | <b>1.11</b>                                      | <b>1.45</b>                                                        |
| <i>Ddx58</i>   | 0.35                                             | <b>0.95</b>                                                        |

|                 |             |             |
|-----------------|-------------|-------------|
| <i>Defb1</i>    | 0.96        | 0.17        |
| <i>Fkbp5</i>    | <b>1.48</b> | -0.31       |
| <i>Gzmb</i>     | <b>0.87</b> | <b>1.29</b> |
| <i>Ifi35</i>    | 0.26        | <b>0.56</b> |
| <i>Ifih1</i>    | 0.36        | <b>1.03</b> |
| <i>Ifit2</i>    | 0.54        | <b>1.23</b> |
| <i>Ifitm1</i>   | 0.30        | <b>0.42</b> |
| <i>Ifngr1</i>   | 0.16        | -0.21       |
| <i>Il15</i>     | 0.31        | 0.08        |
| <i>Il15ra</i>   | 0.42        | -0.03       |
| <i>Il17rb</i>   | 0.23        | -0.18       |
| <i>Il1rn</i>    | 0.62        | <b>1.00</b> |
| <i>Il6st</i>    | -0.05       | -0.15       |
| <i>Irf1</i>     | -0.08       | <b>0.93</b> |
| <i>Irf7</i>     | <b>2.75</b> | <b>1.60</b> |
| <i>Msr1</i>     | <b>1.15</b> | <b>0.97</b> |
| <i>Mx1</i>      | 0.58        | <b>0.72</b> |
| <i>Myd88</i>    | <b>0.35</b> | <b>0.31</b> |
| <i>Nfil3</i>    | 0.07        | 0.17        |
| <i>Nod2</i>     | 0.35        | 0.54        |
| <i>Pml</i>      | 0.17        | <b>0.94</b> |
| <i>Psmb9</i>    | 0.33        | <b>0.67</b> |
| <i>S100a8</i>   | 0.31        | -0.08       |
| <i>Serping1</i> | <b>0.45</b> | -0.06       |
| <i>Smad3</i>    | -0.05       | -0.22       |
| <i>Socs1</i>    | 0.03        | <b>1.25</b> |
| <i>Stat1</i>    | 0.30        | <b>1.57</b> |
| <i>Stat2</i>    | 0.76        | <b>1.99</b> |
| <i>Stat3</i>    | 0.13        | 0.14        |



|                  |             |             |
|------------------|-------------|-------------|
| <i>Tagap</i>     | -0.09       | 0.10        |
| <i>Tap1</i>      | <b>0.55</b> | <b>1.24</b> |
| <i>Tgfb1</i>     | -0.05       | 0.05        |
| <i>Tlr3</i>      | 0.15        | 0.30        |
| <i>Tnfaip3</i>   | <b>0.81</b> | 0.43        |
| <i>Tnfaip6</i>   | 0.58        | 0.58        |
| <i>Tnfrsf13b</i> | 0.02        | 0.28        |
| <i>Tnfsf10</i>   | -0.27       | 0.46        |

\*RSV n=10, RNA collected 4 days post-infection

^PBS n=9

ˆˆRSV and ssON (6.25µg) n=10, RNA collected 4 days post-infection
